# Supplementary material for: A Novel Snf2 Protein Maintains trans-Generational Regulatory States Established by Paramutation in Maize
Source: PLOS journal article supplement (doi:10.1371/journal.pbio.0050275), 2007-10-10
Supplement: S2 (10.1371/journal.pbio.0050275.s002) [file journal.pbio.0050275.s002]

| Staminate  parent | Parental plant phenotype | Allele tested | No. of progeny with specific plant phenotypes | |
| --- | --- | --- | --- | --- |
| B-I | B |
|  | | | | |
| 02-508-22 | Dark B-I | *rmr1-1* | 0 | 60 |
| 02-508-60 | B-I | *rmr1-1* | 4 | 30 |
| 02-514-8 | Dark B | *rmr1-3* | 0 | 53 |
| 02-514-73 | B-I | *rmr1-3* | 0 | 59 |
|  |  |  |  |  |
| Totals |  |  | 4 | 202 |
